CORRECTION

# Correction: Multi-level Modeling of Light-Induced Stomatal Opening Offers New Insights into Its Regulation by Drought

The *PLOS Computational Biology* Staff

[S4 Table](#) contains an error in the simulated stomatal opening value for PIP2 knockout mutants under white light. The correct value, Stomatal opening = 2, makes the simulated result inconsistent with the experimental observation. The correct model validation rate, and corrected last sentence of the first paragraph of the Results subsection “The model predicts the effects of single knockouts” are as follows:

“Sixty-six comparisons were made in total (see [S4 Table](#)), out of which 63 instances exhibited qualitative consistence between experimental observations and simulation results—a successful validation rate of 95%.”

[S4 Table](#) and [S1 Text](#) also include some minor typographical errors, which do not affect the validity of the results.

Please view the correct versions of [S4 Table](#) and [S1 Text](#) here:

## Supporting Information

**S1 Text. Description of node levels and updating rules.**

(DOCX)

**S4 Table. Compilation of comparisons between published experimental observations and the model’s results for simulations of the identical conditions.**

(DOCX)

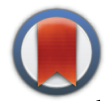

CrossMark  
click for updates

## Reference

1. Sun Z, Jin X, Albert R, Assmann SM (2014) Multi-level Modeling of Light-Induced Stomatal Opening Offers New Insights into Its Regulation by Drought. *PLoS Comput Biol* 10(11): e1003930. doi: [10.1371/journal.pcbi.1003930](https://doi.org/10.1371/journal.pcbi.1003930) PMID: [25393147](https://pubmed.ncbi.nlm.nih.gov/25393147/)

## OPEN ACCESS

**Citation:** The *PLOS Computational Biology* Staff (2016) Correction: Multi-level Modeling of Light-Induced Stomatal Opening Offers New Insights into Its Regulation by Drought. *PLoS Comput Biol* 12(11): e1005181. doi:10.1371/journal.pcbi.1005181

**Published:** November 30, 2016

**Copyright:** © 2016 The PLOS Computational Biology Staff. This is an open access article distributed under the terms of the [Creative Commons Attribution License](https://creativecommons.org/licenses/by/4.0/), which permits unrestricted use, distribution, and reproduction in any medium, provided the original author and source are credited.
